# Supplementary material for: Native mass spectrometry and structural studies reveal modulation of MsbA–nucleotide interactions by lipids
Source: Springer Nature journal article supplement (doi:10.1038/s41467-024-50350-9), 2024-07-15
Supplement: MOESM1 [file 41467_2024_50350_MOESM1_ESM.pdf › 41467_2024_50350_MOESM1_ESM.pdf]

## **Supplementary Information**

### **Native mass spectrometry and structural studies reveal modulation of MsbA-nucleotide interactions by lipids**

Tianqi Zhang<sup>1</sup>, Jixing Lyu<sup>1</sup>, Bowei Yang<sup>2</sup>, Sangho D. Yun<sup>1</sup>, Elena Scott<sup>1</sup>, Minglei Zhao<sup>2</sup>, Arthur Laganowsky<sup>1,\*</sup>

<sup>1</sup>Department of Chemistry, Texas A&M University, College Station, TX 77843

<sup>2</sup>Department of Biochemistry and Molecular biology, University of Chicago, Chicago, IL 60637

\*Correspondence to: [ALaganowsky@chem.tamu.edu](mailto:ALaganowsky@chem.tamu.edu)

## Supplementary Figures

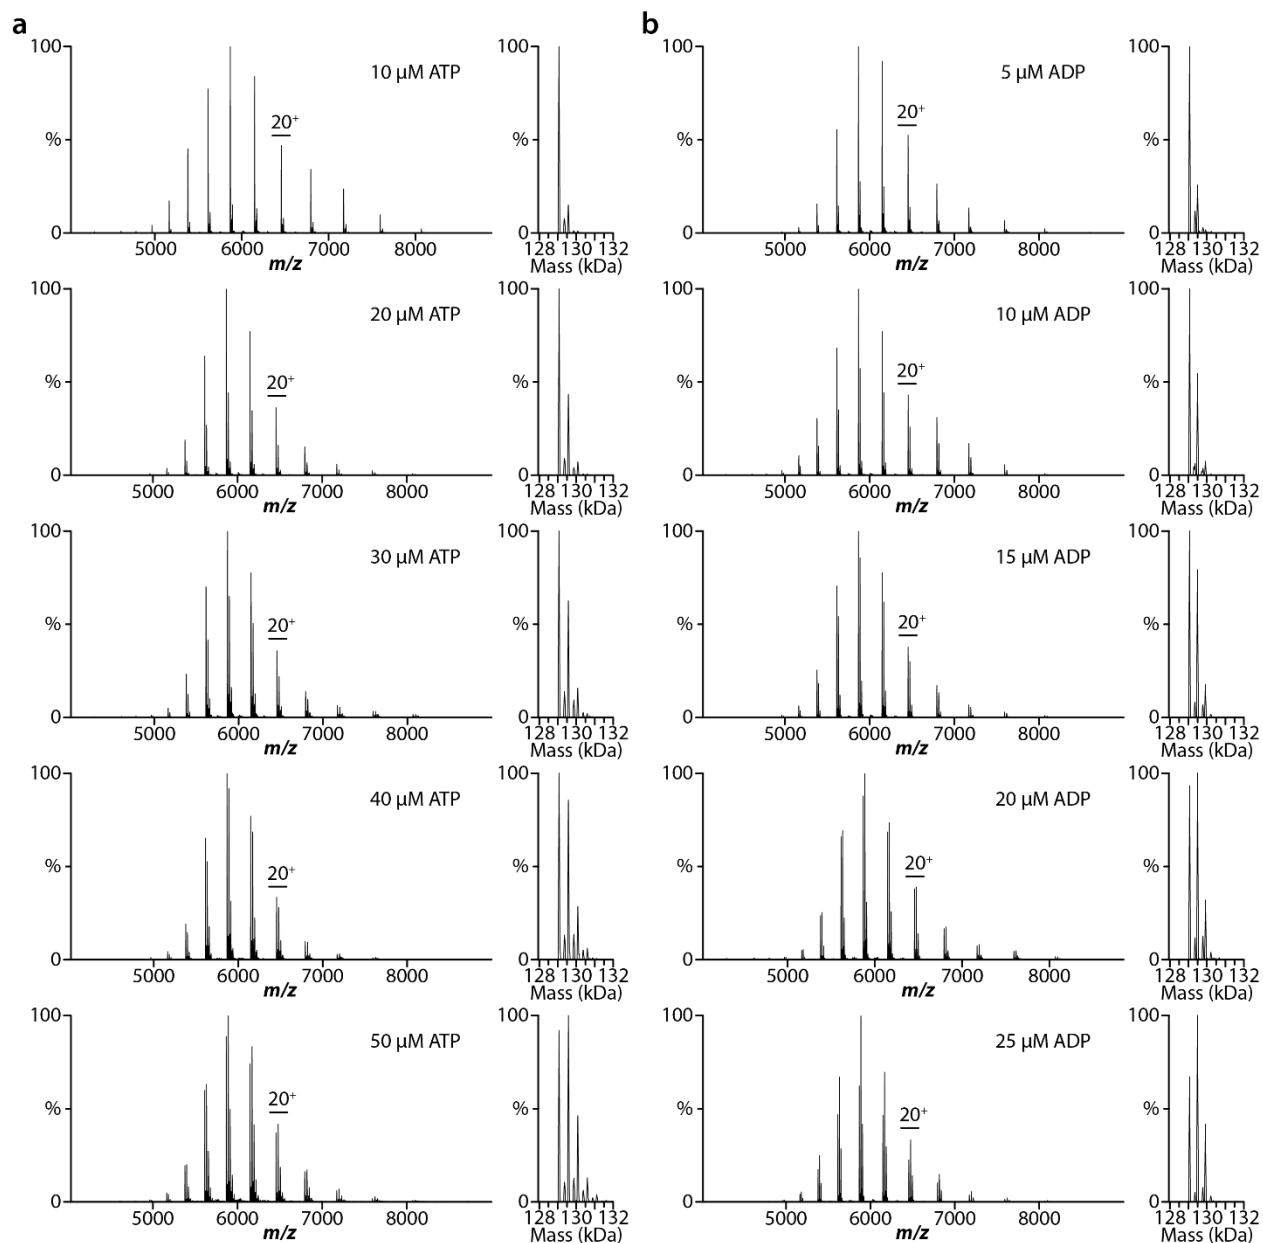

**Supplementary Fig. 1. Representative native mass spectra for nucleotide binding to MsbA.** MsbA (0.5  $\mu\text{M}$ ) was mixed with 10  $\mu\text{M}$   $\text{Mg}^{2+}$  and different concentrations of **a** ATP and **b** ADP. Deconvoluted mass spectra are shown to the right.

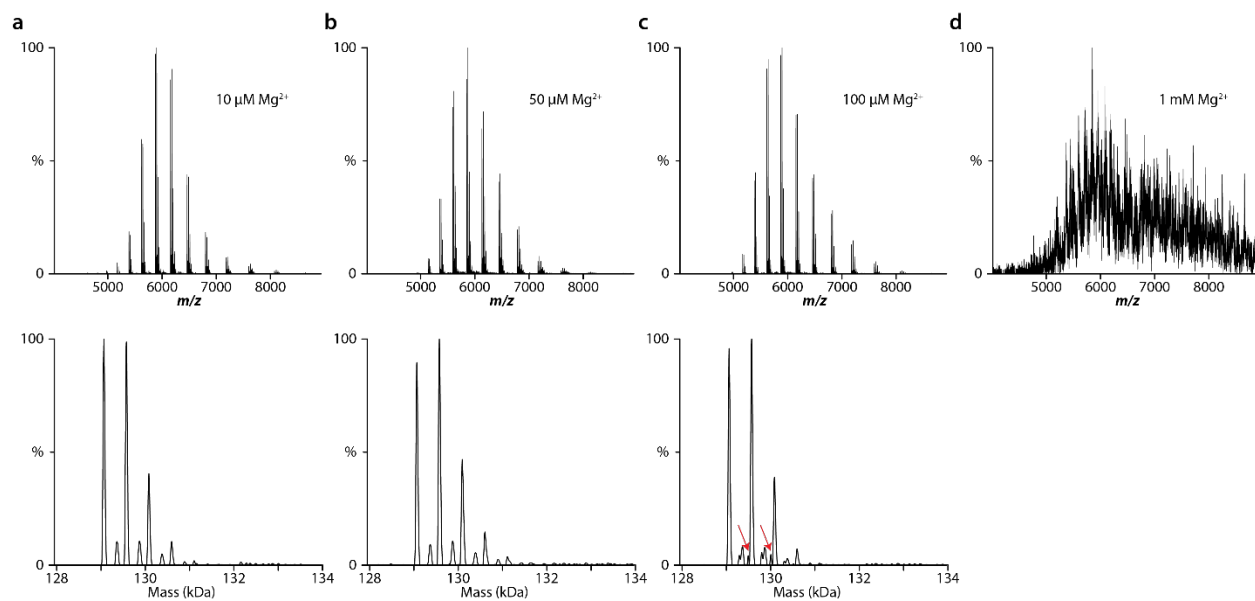

**Supplementary Fig. 2. Native mass spectra for nucleotide binding to MsbA in the presence of different concentrations of  $\text{Mg}^{2+}$ .** MsbA ( $0.5 \mu\text{M}$ ) was mixed with  $50 \mu\text{M}$  ATP and different concentrations of  $\text{Mg}^{2+}$ . Deconvoluted mass spectra are shown below with peaks corresponding to ADP binding denoted with an arrow.

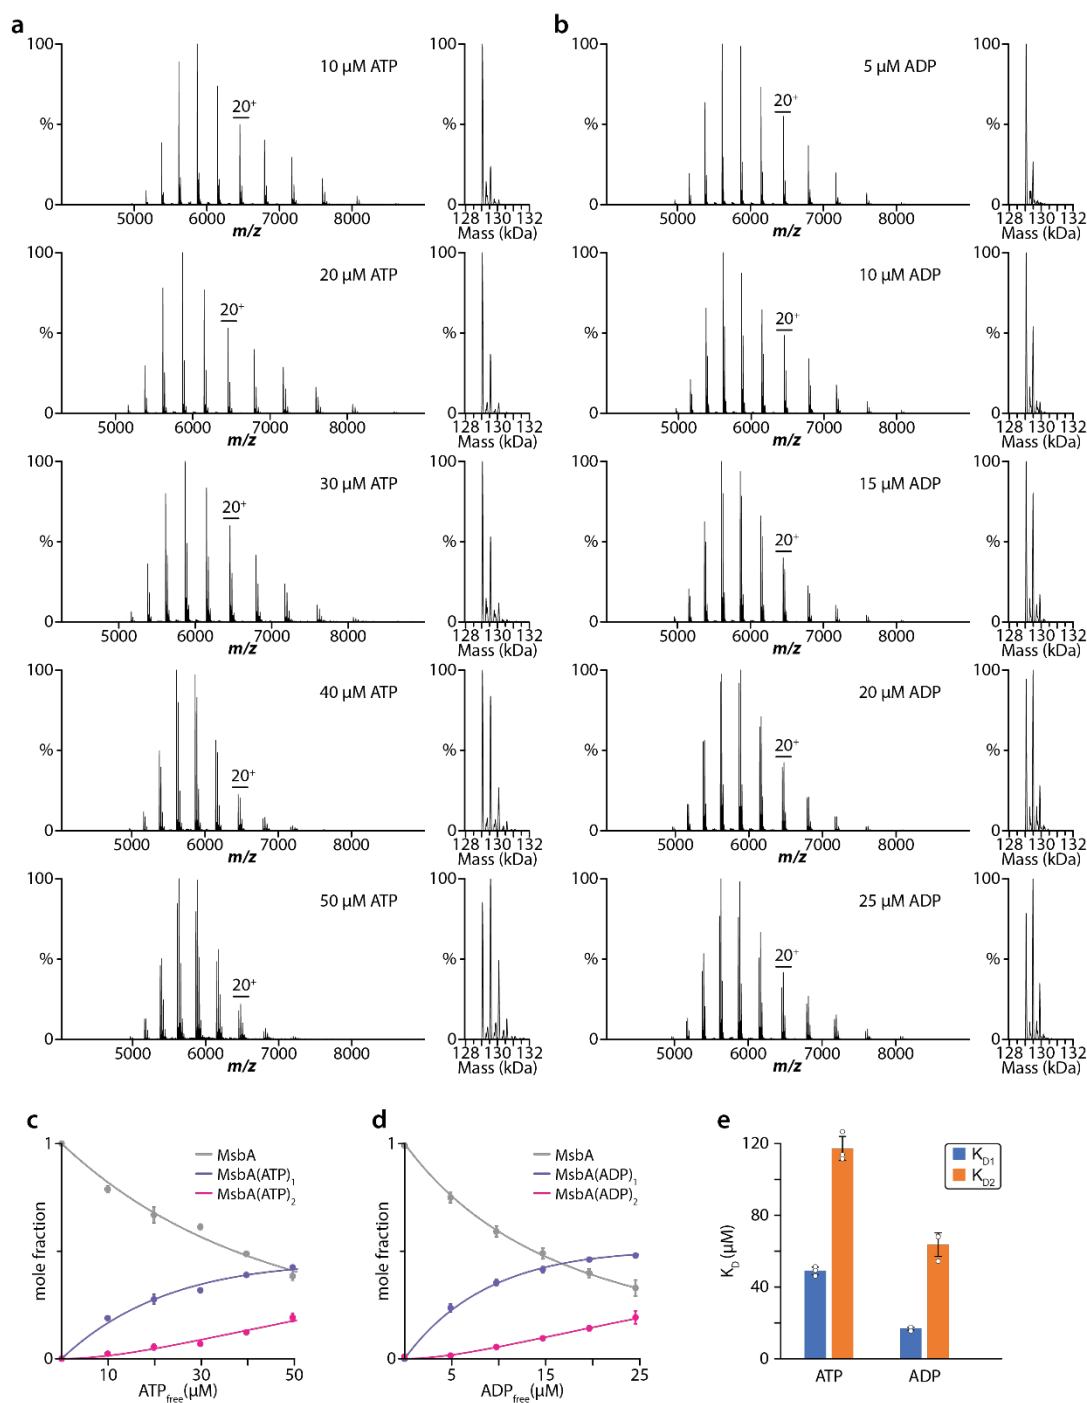

**Supplementary Fig. 3. Determination of equilibrium dissociation constants ( $K_D$ ) for individual nucleotide-binding events to MsbA in the presence of 50  $\mu\text{M}$   $\text{Mg}^{2+}$ .** Representative native mass spectra and the deconvolution for nucleotide binding to MsbA. MsbA (0.5  $\mu\text{M}$ ) was mixed with 50  $\mu\text{M}$   $\text{Mg}^{2+}$  and different concentrations of **a** ATP and **b** ADP. **c** Plot of mole fraction data for MsbA(ATP)<sub>0-2</sub> determined from the titration series (dots) and resulting fit from a sequential ligand-binding model (solid lines). **d** Plot of mole fraction data for MsbA(ADP)<sub>0-2</sub> determined as described for panel c. **e**  $K_{Dn}$  values for the  $n^{\text{th}}$  nucleotide binding to MsbA. Reported are the mean and standard deviation ( $n = 3$ , biological replicates). Source data are provided as a Source Data file.

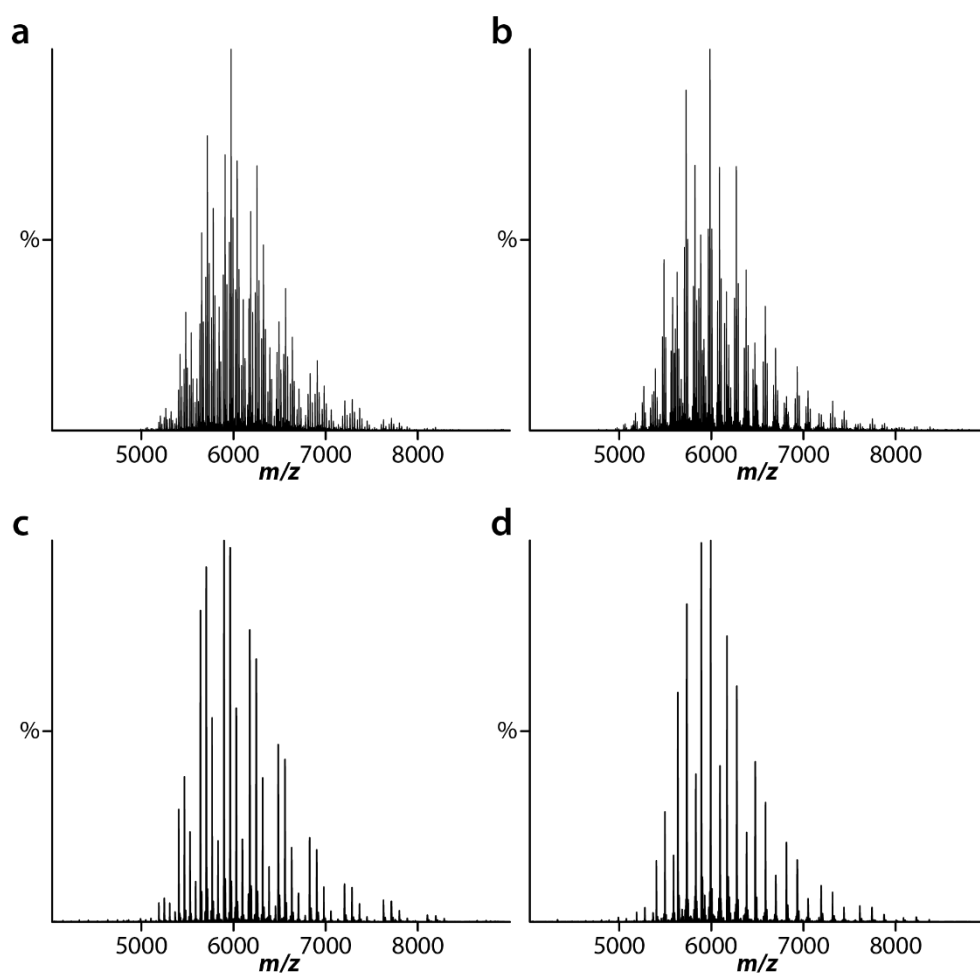

**Supplementary Fig. 4. Native mass spectra of ADP and lipid binding to MsbA.** The deconvolution of these mass spectra are shown in Figure 2.

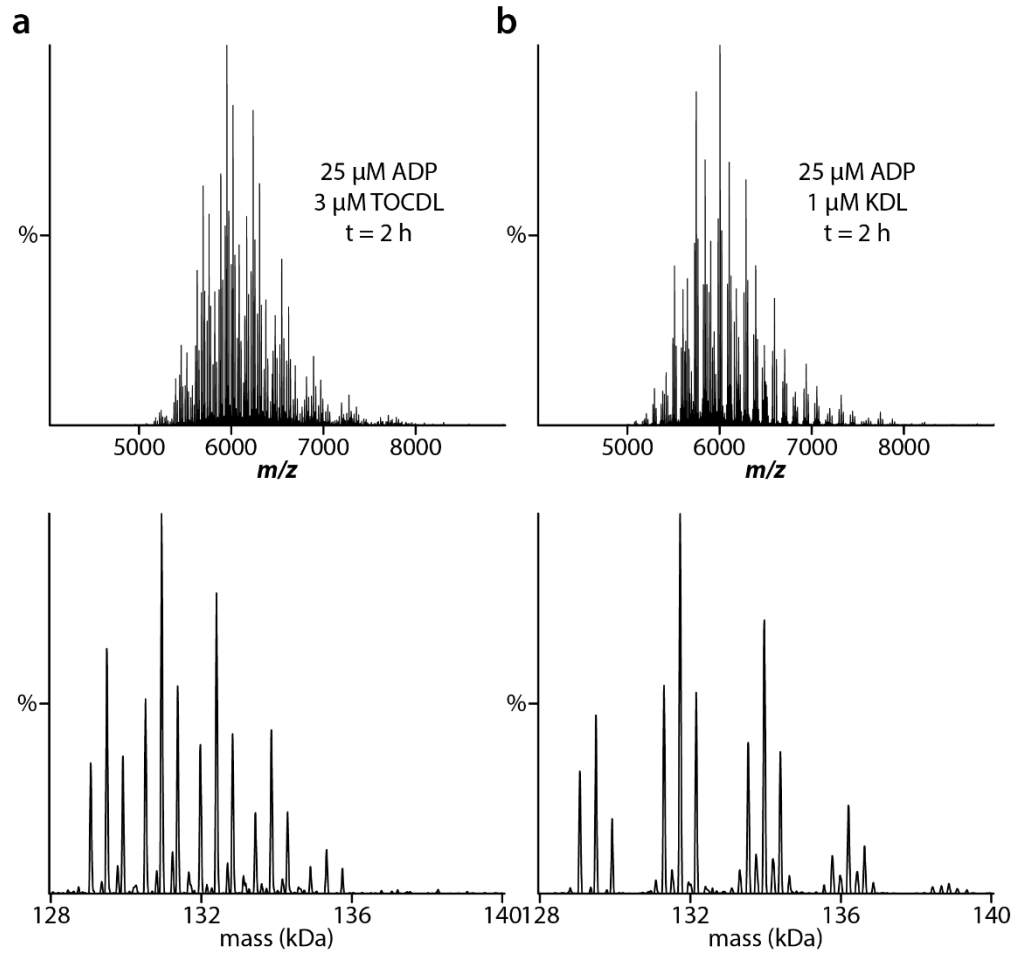

**Supplementary Fig. 5. Characterization of ADP and lipid binding to MsbA.** Native mass spectra (top) and the deconvolution (bottom) of 0.5  $\mu\text{M}$  MsbA mixed with 10  $\mu\text{M}$   $\text{Mg}^{2+}$ , 25  $\mu\text{M}$  ADP and **a** 3  $\mu\text{M}$  TOCDL or **b** 1  $\mu\text{M}$  KDL. Data was recorded after 2-hour incubation.

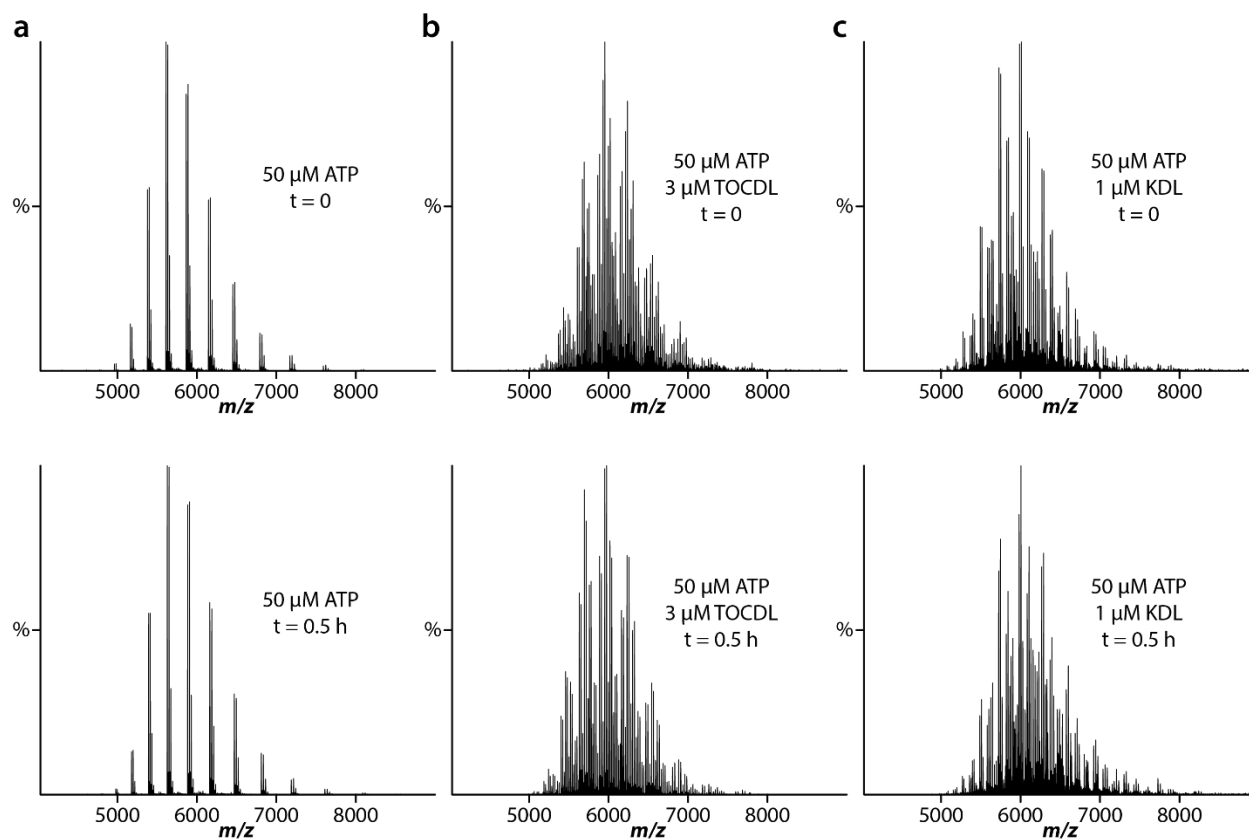

**Supplementary Fig. 6. Native mass spectra of ATP and lipid binding to MsbA.** The deconvolution of these mass spectra are shown in Figure 3.

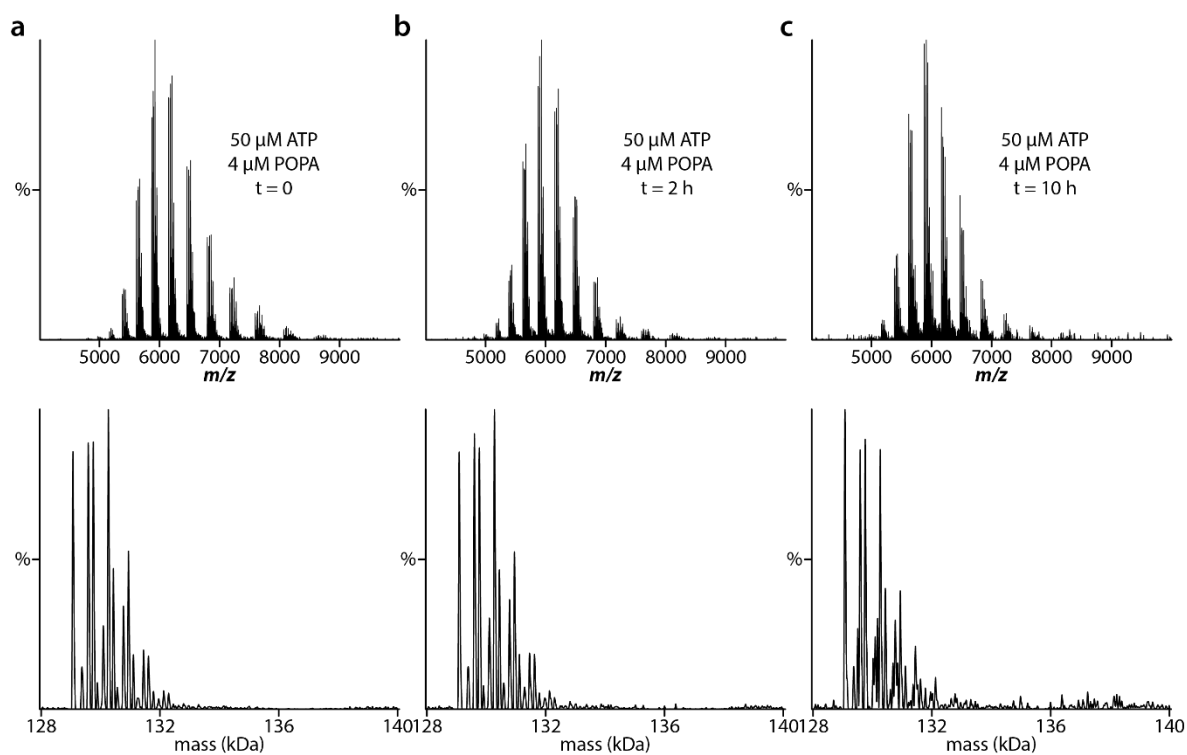

**Supplementary Fig. 7. Native mass spectra of MsbA mixed with ATP and POPA.** Mass spectra (top) and deconvolution (bottom) for 0.5  $\mu\text{M}$  MsbA mixed with 10  $\mu\text{M}$   $\text{Mg}^{2+}$ , 50  $\mu\text{M}$  ATP and 4  $\mu\text{M}$  POPA. Data was acquired **a** right after mixing and after incubation for **b** 2 and **c** 10 hours.



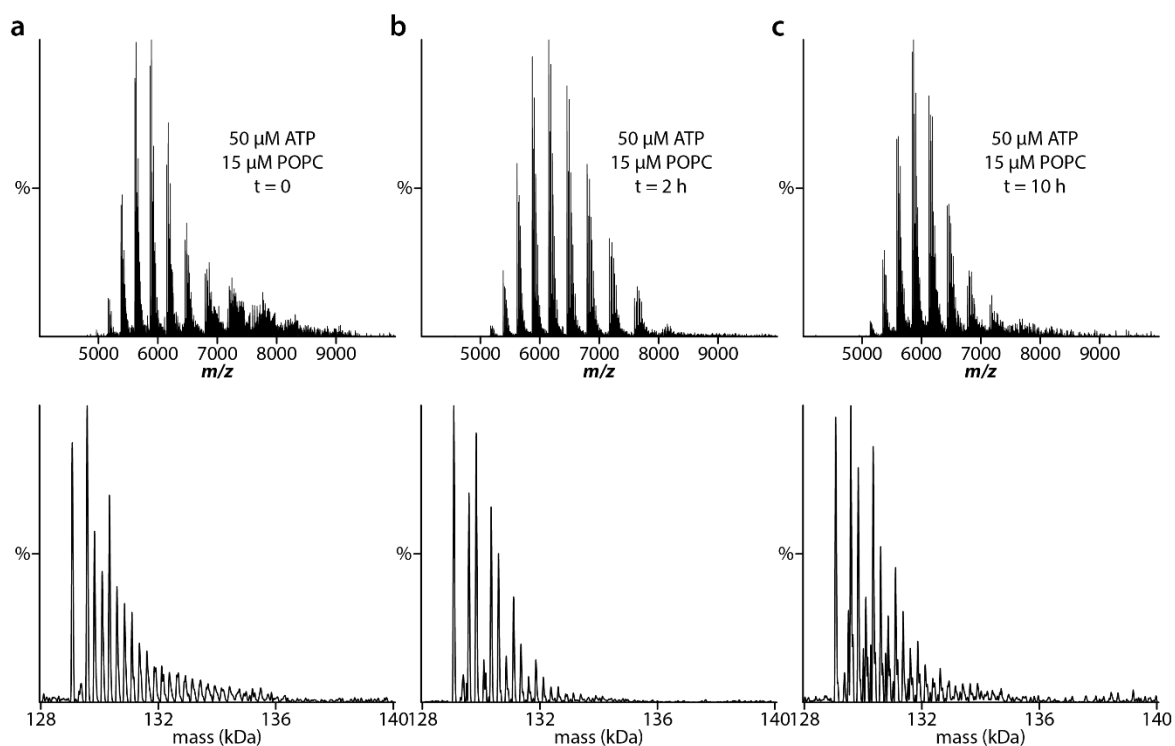

**Supplementary Fig. 8. Native mass spectra of MsbA mixed with ATP and POPC.** Mass spectra (top) and deconvolution (bottom) for 0.5  $\mu\text{M}$  MsbA mixed with 10  $\mu\text{M}$   $\text{Mg}^{2+}$ , 50  $\mu\text{M}$  ATP and 15  $\mu\text{M}$  POPC. Data was acquired **a** right after mixing and after incubation for **b** 2 and **c** 10 hours.

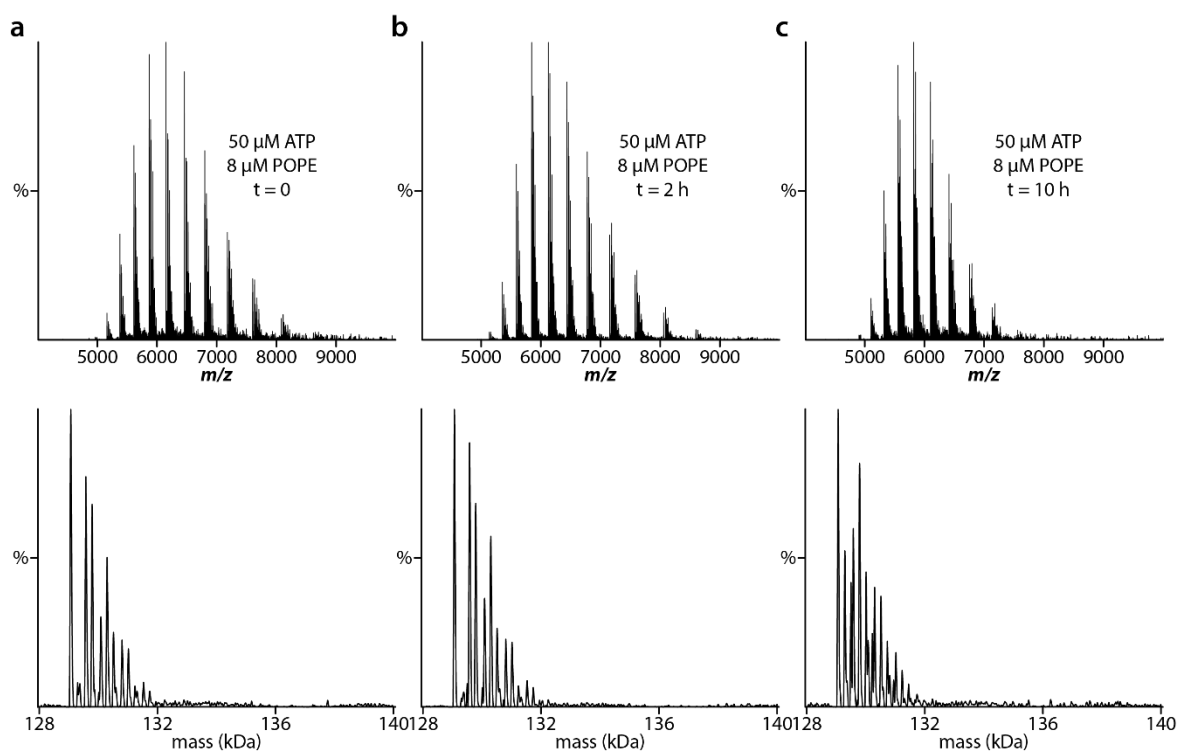

**Supplementary Fig. 9. Native mass spectra of MsbA mixed with ATP and POPE.** Mass spectra (top) and deconvolution (bottom) for 0.5  $\mu$ M MsbA mixed with 10  $\mu$ M  $\text{Mg}^{2+}$ , 50  $\mu$ M ATP and 8  $\mu$ M POPE. Data was acquired **a** right after mixing and after incubation for **b** 2 and **c** 10 hours.

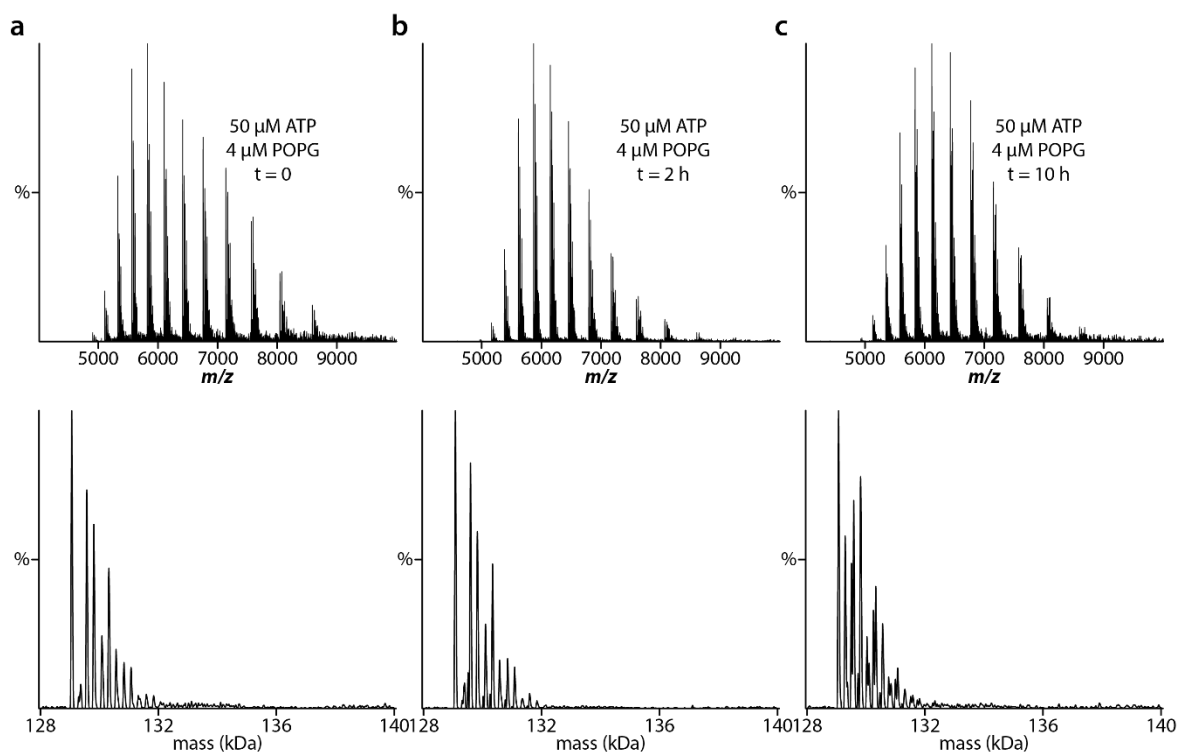

**Supplementary Fig. 10. Native mass spectra of MsbA mixed with ATP and POPG.** Mass spectra (top) and deconvolution (bottom) for 0.5  $\mu\text{M}$  MsbA mixed with 10  $\mu\text{M}$   $\text{Mg}^{2+}$ , 50  $\mu\text{M}$  ATP and 4  $\mu\text{M}$  POPG. Data was acquired **a** right after mixing and after incubation for **b** 2 and **c** 10 hours.

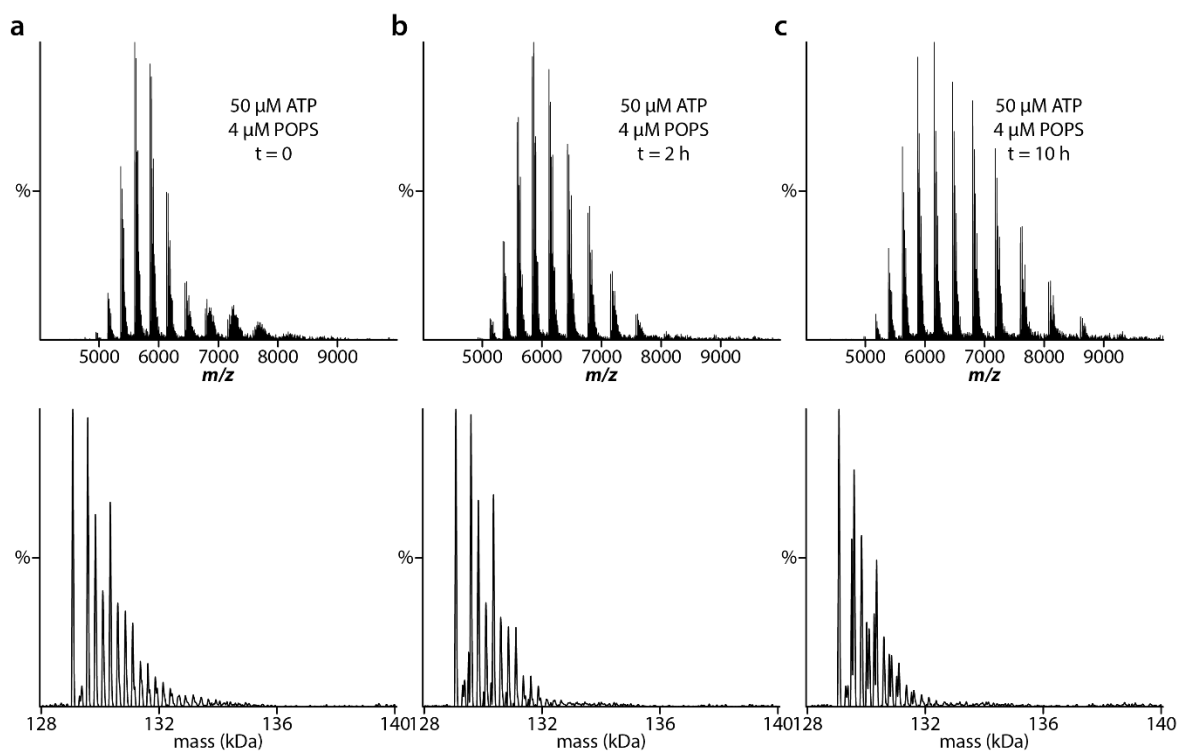

**Supplementary Fig. 11. Native mass spectra of MsbA mixed with ATP and POPS.** Mass spectra (top) and deconvolution (bottom) for 0.5  $\mu$ M MsbA mixed with 10  $\mu$ M  $\text{Mg}^{2+}$ , 50  $\mu$ M ATP and 4  $\mu$ M POPS. Data was acquired **a** right after mixing and after incubation for **b** 2 and **c** 10 hours.

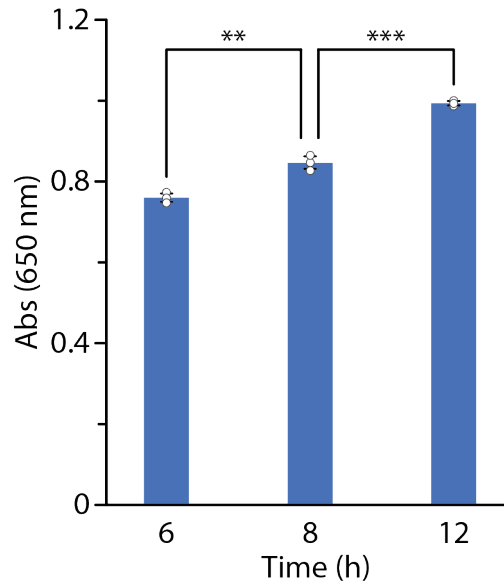

**Supplementary Fig. 12. ATPase activity assay of MsbA sample under conditions used for cryoEM.** MsbA samples were frozen at a 6-hour time point and the transporter was still active, hydrolyzing ATP. Reported are the mean and standard deviation of the absorbance from a malachite green assay ( $n = 3$ , biological replicates). A student's  $t$ -test (\*\* $p \leq 0.01$ , \*\*\* $p \leq 0.001$ ) was performed to compare different time points. Source data are provided as a Source Data file.

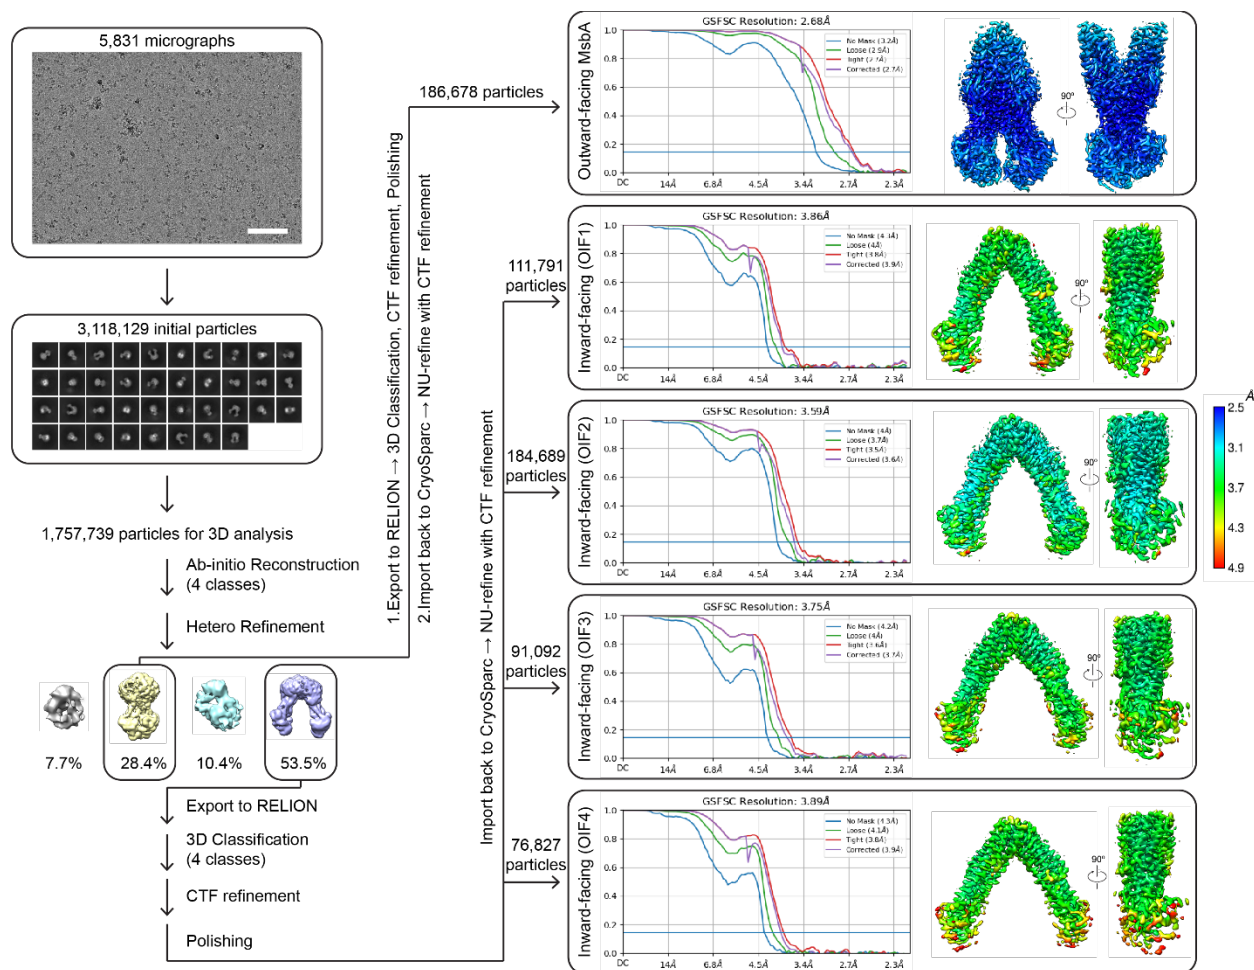

**Supplementary Fig. 13. Single-particle cryoEM analysis workflow for MsbA.** A representative motion-corrected micrograph is shown along with a 90-nm scale bar. Representative 2D class averages are shown, with the edges of the bounding boxes corresponding to  $\sim 273$  Å. Fourier shell correlation curves of the final reconstructions are presented. The final sharpened maps, colored with local resolutions, are shown in two distinct orientations. The outward-facing map is contoured using a threshold of 1.4. The inward-facing maps are contoured using a threshold of 0.4. The resolutions reported in this study were determined using the FSC=0.143 criterion.

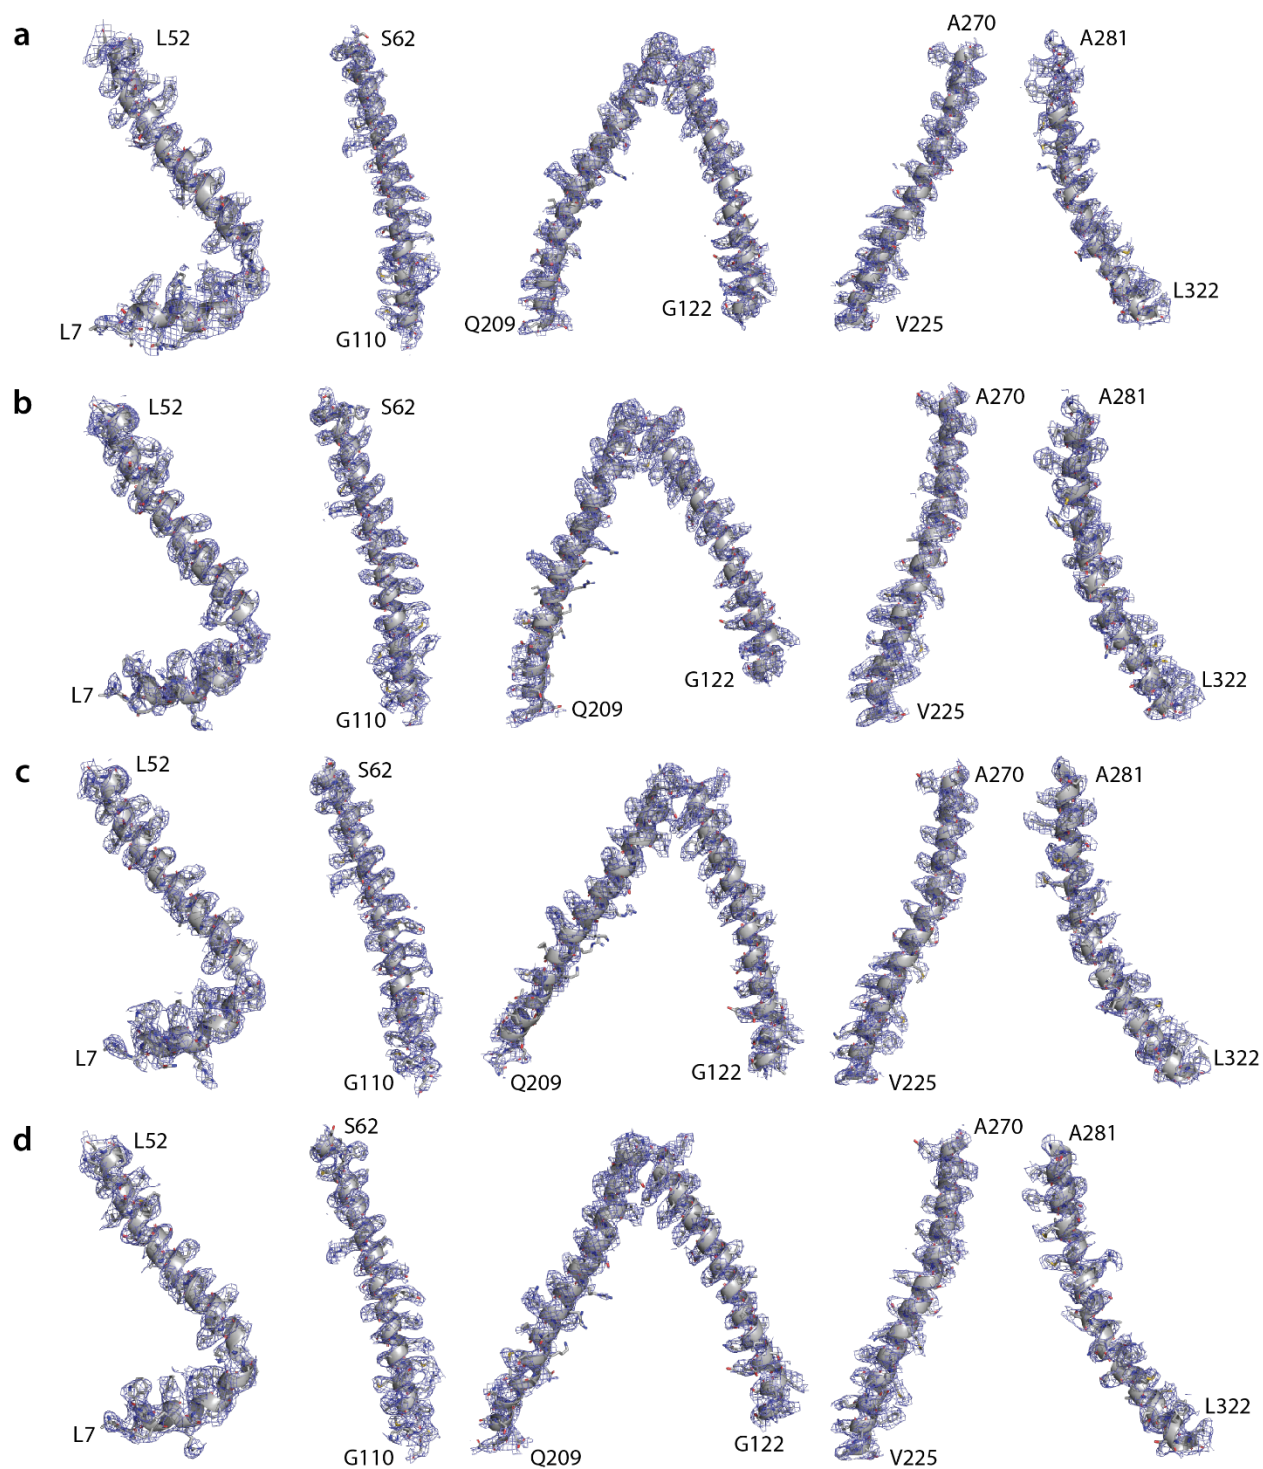

**Supplementary Fig. 14. CryoEM density of the inward-facing MsbA structures.** Density (contoured at 6 sigma) and atomic model for six transmembrane helices of **a** OIF1, **b** OIF2, **c** OIF3 and **d** OIF4 MsbA structures.

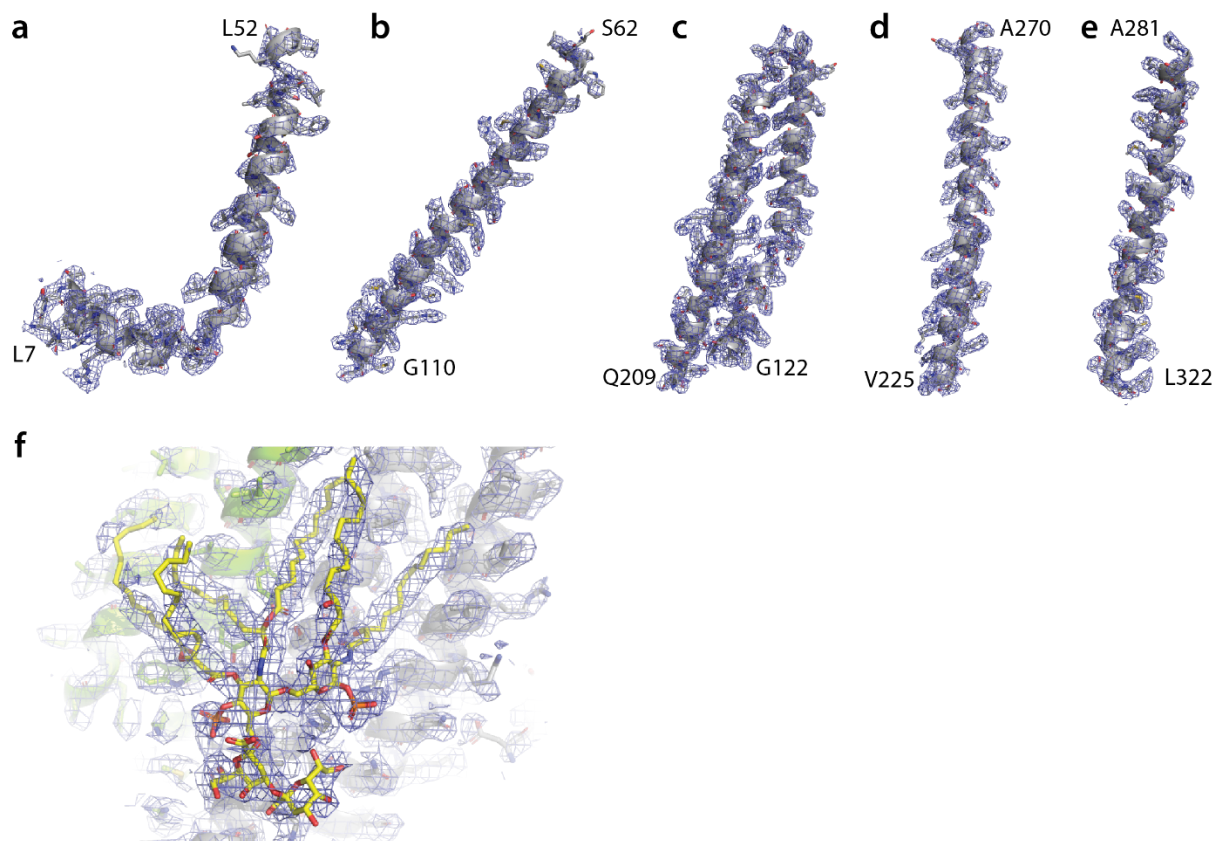

**Supplementary Fig. 15. CryoEM density of the open, outward-facing MsbA structure. a-e** Density (contoured at 6 sigma) and atomic model for six transmembrane helices. **f** Density (contoured at 6 sigma) for the bound KDL.



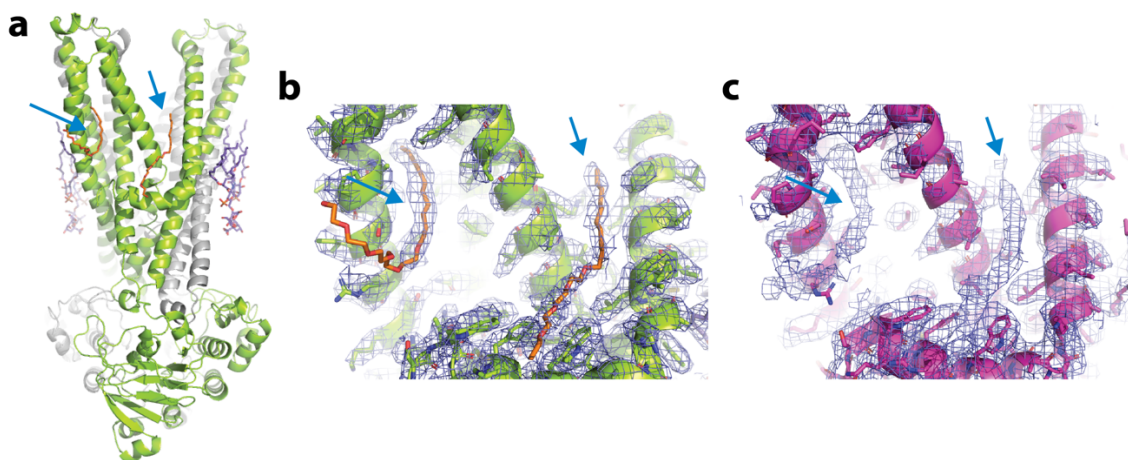

**Supplementary Fig. 16. Tube-like density in open, outward-facing MsbA nucleotide-free and bound to ADP and vanadate.** **a** Structure of nucleotide-free MsbA in open, outward-facing conformation shown in cartoon representation. Bound KDL (purple) and C<sub>10</sub>E<sub>5</sub> (orange) are shown in stick representation. The modeled C<sub>10</sub>E<sub>5</sub> detergents are highlighted by a blue arrow. **b** View of the tube-like densities (contoured at 6 sigma) in transmembrane region. The left penetrates a hydrophobic pocket formed by TM5 and TM6. The right is located between TM6 and TM1. **c** Similar view as b but for the open, outward-facing MsbA structure bound to KDL, ADP and vanadate. The density is shown as well (contoured at 4 sigma).

## Supplementary Tables

**Supplementary Table 1. Theoretical and experimental masses.** Reported are the mean and standard deviation of centroid masses.

|                                                                           | Theoretical (Da) | Experimental (Da) |
|---------------------------------------------------------------------------|------------------|-------------------|
| <b>MsbA<sub>2</sub></b>                                                   | 129,074          | 129,067 ± 2       |
| <b>MsbA<sub>2</sub>(Cu)<sub>2</sub>(ATP)<sub>1</sub></b>                  | 129,581          | 129,573 ± 1       |
| <b>MsbA<sub>2</sub>(Cu)<sub>2</sub>(ATP)<sub>2</sub></b>                  | 130,088          | 130,085 ± 2       |
| <b>MsbA<sub>2</sub>(Cu)<sub>2</sub>(ADP)<sub>1</sub></b>                  | 129,501          | 129,494 ± 0       |
| <b>MsbA<sub>2</sub>(Cu)<sub>2</sub>(ADP)<sub>2</sub></b>                  | 129,928          | 129,922 ± 1       |
| <b>MsbA<sub>2</sub>(Cu)<sub>2</sub>(KDL)<sub>1</sub>(ATP)<sub>2</sub></b> | 132,323          | 132,324 ± 1       |
| <b>MsbA<sub>2</sub>(Cu)<sub>2</sub>(KDL)<sub>2</sub>(ATP)<sub>2</sub></b> | 134,558          | 134,559 ± 2       |
| <b>MsbA<sub>2</sub>(Cu)<sub>2</sub>(KDL)<sub>3</sub>(ATP)<sub>2</sub></b> | 136,793          | 136,796 ± 1       |
| <b>MsbA<sub>2</sub>(Cu)<sub>2</sub>(KDL)<sub>4</sub>(ATP)<sub>2</sub></b> | 139,028          | 139,035 ± 2       |

**Supplementary Table 2. Equilibrium dissociation constants of MsbA-nucleotide interactions determined by native MS.**  $K_D$  was obtained from fitting a sequential ligand binding model to mole fraction data from titration. Reported are the mean and standard deviation ( $n = 3$ , biological replicates).

| $Mg^{2+}$ ( $\mu M$ ) | $K_{D1}$ (ATP, $\mu M$ ) | $K_{D2}$ (ATP, $\mu M$ ) | $K_{D1}$ (ADP, $\mu M$ ) | $K_{D2}$ (ADP, $\mu M$ ) |
|-----------------------|--------------------------|--------------------------|--------------------------|--------------------------|
| <b>10</b>             | 47.8 $\pm$ 2.5           | 124.4 $\pm$ 6.2          | 17.8 $\pm$ 1.3           | 62.3 $\pm$ 4.7           |
| <b>50</b>             | 49.0 $\pm$ 2.1           | 117.4 $\pm$ 6.7          | 16.7 $\pm$ 0.9           | 63.7 $\pm$ 6.6           |

**Supplementary Table 3. Distance between NBDs of open, inward-facing MsbA structures.** The reported distance corresponds to the distance between T561 C $\alpha$  to T561 C $\alpha$  of the neighboring subunit.

|                      | Distance (Å) |
|----------------------|--------------|
| OIF4 (8TSR)          | 91.7         |
| OIF3 (8TSS)          | 89.9         |
| 3B5W                 | 85.1         |
| 8DMO                 | 79.3         |
| OIF2 (8TSQ) and 6BL6 | 75.9         |
| OIF1 (8TSP)          | 64.8         |

**Supplementary Table 4. Statistics of cryoEM data collection and processing.**

|                                                     |                               |                            |                            |                            |                            |
|-----------------------------------------------------|-------------------------------|----------------------------|----------------------------|----------------------------|----------------------------|
| <b>Microscope</b>                                   | Krios (University of Chicago) |                            |                            |                            |                            |
| <b>Magnification</b>                                | 81,000                        |                            |                            |                            |                            |
| <b>Voltage (kV)</b>                                 | 300                           |                            |                            |                            |                            |
| <b>Spherical aberration (mm)</b>                    | 2.7                           |                            |                            |                            |                            |
| <b>Detector</b>                                     | K3                            |                            |                            |                            |                            |
| <b>Camera mode</b>                                  | Super resolution counting     |                            |                            |                            |                            |
| <b>Exposure rate (e<sup>-</sup>/pixel/s)</b>        | 15                            |                            |                            |                            |                            |
| <b>Total exposure (e<sup>-</sup>/Å<sup>2</sup>)</b> | 50                            |                            |                            |                            |                            |
| <b>Defocus range (μm)</b>                           | -1.0 to -2.5                  |                            |                            |                            |                            |
| <b>Pixel size (Å)</b>                               | 0.5325 (1.065 physical)       |                            |                            |                            |                            |
| <b>Mode of data collection</b>                      | Image shift                   |                            |                            |                            |                            |
| <b>Energy filter</b>                                | 20 eV slit                    |                            |                            |                            |                            |
| <b>Software for data collection</b>                 | EPU                           |                            |                            |                            |                            |
| <b>Number of micrographs</b>                        | 5,831                         |                            |                            |                            |                            |
| <b>Symmetry imposed</b>                             | C2                            |                            |                            |                            |                            |
| <b>Box size (pixel)</b>                             | 256                           |                            |                            |                            |                            |
| <b>Initial particle images (no.)</b>                | 3,118,129                     |                            |                            |                            |                            |
| <b>Particle images for 3D (no.)</b>                 | 1,757,739                     |                            |                            |                            |                            |
|                                                     | Open, outward-facing MsbA     | Open, inward-facing (OIF1) | Open, inward-facing (OIF2) | Open, inward-facing (OIF3) | Open, inward-facing (OIF4) |
| <b>Final particle images (no.)</b>                  | 186,678                       | 111,791                    | 184,689                    | 91,092                     | 76,827                     |
| <b>Map resolution, unmasked (Å)</b>                 | 3.2                           | 4.3                        | 4.0                        | 4.2                        | 4.3                        |
| <b>Map resolution, masked (Å)</b>                   | 2.7                           | 3.9                        | 3.6                        | 3.7                        | 3.9                        |
| <b>B-factor used for sharpening (Å<sup>2</sup>)</b> | 108.7                         | 168.7                      | 153.1                      | 155.9                      | 151.5                      |
| <b>EMD accession code</b>                           | EMD-41596                     | EMD-41597                  | EMD-41598                  | EMD-41560                  | EMD-41599                  |

Supplementary Table 5. Statistics of cryoEM model refinement and geometry for five MsbA structures.

| Model                        | Open, outward-facing MsbA      | OIF1                           | OIF2                           | OIF3                           | OIF4                           |
|------------------------------|--------------------------------|--------------------------------|--------------------------------|--------------------------------|--------------------------------|
| PDB accession code           | 8TSO                           | 8TSP                           | 8TSQ                           | 8TSS                           | 8TSR                           |
| Composition (#)              |                                |                                |                                |                                |                                |
| Chains                       | 4                              | 2                              | 2                              | 2                              | 2                              |
| Atoms                        | 9298 (Hydrogens: 0)            | 8888 (Hydrogens: 0)            | 8918 (Hydrogens: 0)            | 8918 (Hydrogens: 0)            | 8888 (Hydrogens: 0)            |
| Residues                     | Protein: 1146<br>Nucleotide: 0 | Protein: 1146<br>Nucleotide: 0 | Protein: 1150<br>Nucleotide: 0 | Protein: 1150<br>Nucleotide: 0 | Protein: 1146<br>Nucleotide: 0 |
| Water                        | 0                              | 0                              | 0                              | 0                              | 0                              |
| Ligands                      | KDL: 2<br>CXE: 4               | 0                              | 0                              | 0                              | 0                              |
| Bonds (RMSD)                 |                                |                                |                                |                                |                                |
| Length (Å) (# > 4 $\sigma$ ) | 0.004 (0)                      | 0.004 (0)                      | 0.005 (0)                      | 0.004 (0)                      | 0.005 (0)                      |
| Angles (°) (# > 4 $\sigma$ ) | 0.626 (0)                      | 0.752 (2)                      | 0.655 (0)                      | 0.750 (0)                      | 0.832 (0)                      |
| MolProbity score             | 1.34                           | 1.70                           | 1.82                           | 1.91                           | 1.76                           |
| Clash score                  | 5.75                           | 10.09                          | 10.06                          | 11.94                          | 11.20                          |
| Ramachandran plot (%)        |                                |                                |                                |                                |                                |
| Outliers                     | 0.00                           | 0.00                           | 0.00                           | 0.09                           | 0.00                           |
| Allowed                      | 2.10                           | 2.98                           | 4.28                           | 4.45                           | 3.15                           |
| Favored                      | 97.90                          | 97.02                          | 95.72                          | 95.46                          | 96.85                          |
| Rotamer outliers (%)         | 0.00                           | 0.72                           | 0.51                           | 0.41                           | 0.51                           |
| C $\beta$ outliers (%)       | 0.00                           | 0.00                           | 0.00                           | 0.00                           | 0.00                           |
| Peptide plane (%)            |                                |                                |                                |                                |                                |
| Cis proline/general          | 0.0/0.0                        | 0.0/0.0                        | 0.0/0.0                        | 0.0/0.0                        | 0.0/0.0                        |
| Twisted proline/general      | 0.0/0.0                        | 0.0/0.0                        | 0.0/0.0                        | 0.0/0.0                        | 7.7/0.0                        |
| CaBLAM outliers (%)          | 1.41                           | 1.41                           | 2.71                           | 2.36                           | 1.67                           |
| ADP (B-factors)              |                                |                                |                                |                                |                                |
| Iso/Aniso (#)                | 9298/0                         | 8888/0                         | 8918/0                         | 8918/0                         | 8888/0                         |
| Protein                      | 52.90                          | 40.94                          | 14.99                          | 56.07                          | 59.21                          |
| Ligand                       | 47.17                          | /                              | /                              | /                              | /                              |
| Data                         |                                |                                |                                |                                |                                |
| Box                          |                                |                                |                                |                                |                                |

|                                         |                         |                          |                          |                          |                          |
|-----------------------------------------|-------------------------|--------------------------|--------------------------|--------------------------|--------------------------|
| <b>Lengths (Å)</b>                      | 90.53, 75.62,<br>136.32 | 67.10, 122.48,<br>136.32 | 75.62, 133.13,<br>135.26 | 67.10, 135.26,<br>136.32 | 67.10, 139.52,<br>135.26 |
| <b>Angles (°)</b>                       | 90.00, 90.00,<br>90.00  | 90.00, 90.00,<br>90.00   | 90.00, 90.00,<br>90.00   | 90.00, 90.00,<br>90.00   | 90.00, 90.00,<br>90.00   |
| <b>Supplied Resolution (Å)</b>          | 2.7                     | 3.9                      | 3.6                      | 3.8                      | 3.9                      |
| <b>Resolution Estimates, Masked (Å)</b> |                         |                          |                          |                          |                          |
| <b>d model</b>                          | 3.0                     | 4.2                      | 3.9                      | 4.1                      | 4.2                      |
| <b>d FSC model<br/>(0/0.143/0.5)</b>    | 2.6/2.6/2.8             | 3.7/3.8/4.1              | 3.3/3.5/3.9              | 3.6/3.7/4.1              | 3.7/3.8/4.1              |
| <b>Map min/max/mean</b>                 | -6.34/11.07/0.10        | -1.73/2.41/0.04          | -2.44/3.34/0.04          | -1.72/2.30/0.03          | -1.53/1.88/0.04          |
| <b>Model vs. Data</b>                   |                         |                          |                          |                          |                          |
| <b>CC (mask)</b>                        | 0.80                    | 0.74                     | 0.72                     | 0.74                     | 0.76                     |
| <b>CC (box)</b>                         | 0.64                    | 0.68                     | 0.67                     | 0.67                     | 0.71                     |
| <b>CC (peaks)</b>                       | 0.63                    | 0.62                     | 0.62                     | 0.60                     | 0.63                     |
| <b>CC (volume)</b>                      | 0.76                    | 0.71                     | 0.69                     | 0.70                     | 0.72                     |
