# Supplementary material for: Native mass spectrometry and structural studies reveal modulation of MsbA–nucleotide interactions by lipids
Source: Springer Nature journal article supplement (doi:10.1038/s41467-024-50350-9), 2024-07-15
Supplement: MOESM3 [file 41467_2024_50350_MOESM3_ESM.pdf › 41467_2024_50350_MOESM3_ESM.pdf]

**File name: Supplementary Movie 1**

**Description: Morph of open, outward-facing MsbA structures in nucleotide-free and ADP and vanadate bound states. The bound KDL is shown in yellow.**
