# Supplementary material for: Native mass spectrometry and structural studies reveal modulation of MsbA–nucleotide interactions by lipids
Source: Nat Commun. 2024 Jul 15;15:5946. doi: 10.1038/s41467-024-50350-9 (PMC11251056; doi:10.1038/s41467-024-50350-9)
Supplement: Supplementary file 6 — Source Data [file 41467_2024_50350_MOESM6_ESM.xlsx]

## Sheet: Figure 1e
Figure 1e
	ATP
	Total [P]	5e-07
		[L]	[P]	[PL1]	[PL2]
		1e-05	0.869565	0.130435	0
		2e-05	0.666667	0.286667	0.0466667
		3e-05	0.617284	0.320988	0.0617284
		4e-05	0.46729	0.401869	0.130841
		5e-05	0.41841	0.414226	0.167364
		[L]	[P]	[PL1]	[PL2]
		1e-05	0.729927	0.240876	0.0291971
		2e-05	0.740741	0.22963	0.0296296
		3e-05	0.558659	0.351955	0.0893855
		4e-05	0.456621	0.415525	0.127854
		5e-05	0.386555	0.420168	0.193277
		[L]	[P]	[PL1]	[PL2]
		1e-05	0.787402	0.19685	0.015748
		2e-05	0.704225	0.260563	0.0352113
		3e-05	0.529101	0.380952	0.0899471
		4e-05	0.4329	0.419913	0.147186
		5e-05	0.45045	0.40991	0.13964

## Sheet: Figure 1f
Figure 1f
	ADP
	Total [P]	5e-07
		[L]	[P]	[PL1]	[PL2]
		5e-06	0.78125	0.203125	0.015625
		1e-05	0.617284	0.339506	0.0432099
		1.5e-05	0.454545	0.431818	0.113636
		2e-05	0.413333	0.444444	0.142222
		2.5e-05	0.320574	0.478469	0.200957
		[L]	[P]	[PL1]	[PL2]
		5e-06	0.793651	0.198413	0.00793651
		1e-05	0.649351	0.311688	0.038961
		1.5e-05	0.507614	0.401015	0.0913706
		2e-05	0.431718	0.440529	0.127753
		2.5e-05	0.375	0.462963	0.162037
		[L]	[P]	[PL1]	[PL2]
		5e-06	0.787402	0.19685	0.015748
		1e-05	0.540541	0.378378	0.0810811
		1.5e-05	0.512821	0.4	0.0871795
		2e-05	0.367442	0.465116	0.167442
		2.5e-05	0.330144	0.478469	0.191388

## Sheet: Figure 1g
Figure 1g
	ATP
		Rep 1	Rep 2	Rep 3	Average	SD
	KD 1	51.37	46.32	45.85	47.8467	2.49875
	KD 2	124.5	116.81	131.89	124.4	6.15679
	ADP
		Rep 1	Rep 2	Rep 3	Average	SD
	KD 1	17.23	19.55	16.59	17.79	1.27164
	KD 2	59.3	68.96	58.6	62.2867	4.7274

## Sheet: Figure 4f
Figure 4f
	mole fraction
	0 h
	number of KDL bound	Rep 1	Rep 2	Rep 3	Average	SD
	0	0.1369	0.358372	0.202548	0.232607	0.0928803
	1	0.339861	0.383554	0.370794	0.364736	0.0183445
	2	0.281016	0.174847	0.269275	0.241713	0.0475234
	3	0.164355	0.0832266	0.121937	0.123173	0.0331322
	4	0.0778673	0	0.0354459	0.0377711	0.0318317
	2 h
	number of KDL bound	Rep 1	Rep 2	Rep 3	Average	SD
	0	0.105902	0.0312941	0.0828147	0.073337	0.0311872
	1	0.219671	0.171728	0.230852	0.207417	0.0256456
	2	0.229384	0.245267	0.25045	0.2417	0.00896214
	3	0.254989	0.291373	0.251787	0.26605	0.0179537
	4	0.190054	0.260339	0.184095	0.211496	0.0346225
	4 h
	number of KDL bound	Rep 1	Rep 2	Rep 3	Average	SD
	0	0.0736109	0.0924377	0.0813486	0.0824657	0.00772651
	1	0.182438	0.201167	0.201623	0.195076	0.00893818
	2	0.270188	0.219986	0.248177	0.246117	0.0205467
	3	0.291528	0.289728	0.286953	0.289403	0.00188192
	4	0.182234	0.196681	0.181899	0.186938	0.00689036
	6 h
	number of KDL bound	Rep 1	Rep 2	Rep 3	Average	SD
	0	0.0462818	0.128722	0.109508	0.0948373	0.0352185
	1	0.147064	0.174095	0.123793	0.148317	0.0205549
	2	0.254966	0.27563	0.225835	0.252144	0.0204264
	3	0.332723	0.288145	0.341696	0.320855	0.0234177
	4	0.218965	0.133407	0.199167	0.183847	0.0365703
	8 h
	number of KDL bound	Rep 1	Rep 2	Rep 3	Average	SD
	0	0.149928	0.154706	0.246577	0.183737	0.0444776
	1	0.307796	0.253987	0.307124	0.289636	0.0252091
	2	0.290468	0.2788	0.236091	0.268453	0.0233737
	3	0.180523	0.212808	0.159728	0.184353	0.0218383
	4	0.0712857	0.0996989	0.050479	0.0738212	0.0201738
	10 h
	number of KDL bound	Rep 1	Rep 2	Rep 3	Average	SD
	0	0.0861472	0.0959109	0.104423	0.0954936	0.00746672
	1	0.258144	0.270505	0.250658	0.259769	0.00818372
	2	0.372287	0.340472	0.271157	0.327972	0.0422217
	3	0.219016	0.216336	0.229073	0.221475	0.00548307
	4	0.0644056	0.0767764	0.144689	0.0952905	0.0352935

## Sheet: Supplementary Fig. 3c
Supplementary Fig. 3c
	ATP
	Total [P]	5e-07
		[L]	[P]	[PL1]	[PL2]
		1e-05	0.787402	0.188976	0.023622
		2e-05	0.689655	0.262069	0.0482759
		3e-05	0.60241	0.325301	0.0722892
		4e-05	0.502513	0.386935	0.110553
		5e-05	0.363248	0.42735	0.209402
		[L]	[P]	[PL1]	[PL2]
		1e-05	0.769231	0.2	0.0307692
		2e-05	0.617284	0.308642	0.0740741
		3e-05	0.606061	0.321212	0.0727273
		4e-05	0.485437	0.383495	0.131068
		5e-05	0.379747	0.421941	0.198312
		[L]	[P]	[PL1]	[PL2]
		1e-05	0.806452	0.177419	0.016129
		2e-05	0.699301	0.258741	0.041958
		3e-05	0.628931	0.308176	0.0628931
		4e-05	0.473934	0.398104	0.127962
		5e-05	0.408511	0.425532	0.165957

## Sheet: Supplementary Fig. 3d
Supplementary Fig. 3d
	ADP
	Total [P]	5e-07
		[L]	[P]	[PL1]	[PL2]
		5e-06	0.724638	0.253623	0.0217391
		1e-05	0.591716	0.35503	0.0532544
		1.5e-05	0.507614	0.406091	0.0862944
		2e-05	0.423423	0.45045	0.126126
		2.5e-05	0.341346	0.480769	0.177885
		[L]	[P]	[PL1]	[PL2]
		5e-06	0.740741	0.244444	0.0148148
		1e-05	0.621118	0.335404	0.0434783
		1.5e-05	0.505051	0.40404	0.0909091
		2e-05	0.393519	0.462963	0.143519
		2.5e-05	0.366197	0.469484	0.164319
		[L]	[P]	[PL1]	[PL2]
		5e-06	0.78125	0.210938	0.0078125
		1e-05	0.561798	0.370787	0.0674157
		1.5e-05	0.456621	0.43379	0.109589
		2e-05	0.375587	0.469484	0.15493
		2.5e-05	0.278049	0.487805	0.234146

## Sheet: Supplementary Fig. 3e
Supplementary Fig. 3e
	ATP
		Rep 1	Rep 2	Rep 3	Average	SD
	KD 1	49.33	46.24	51.36	48.9767	2.10511
	KD 2	113.84	111.56	126.68	117.36	6.65564
	ADP
		Rep 1	Rep 2	Rep 3	Average	SD
	KD 1	17.02	17.56	15.52	16.7	0.863018
	KD 2	68.59	68.05	54.4	63.68	6.56565

## Sheet: Supplementary Fig. 12
Supplementary Fig. 12
	Abs (650 nm)
		Rep 1	Rep 2	Rep 3	Average	SD
	6 h	0.747	0.773	0.759	0.759667	0.0106249
	8 h	0.827	0.847	0.865	0.846333	0.0155206
	12 h	0.993	1	0.987	0.993333	0.00531246
